# Supplementary material
Source: publisher figshare collection journal article supplement (https://acs.figshare.com/ndownloader/files/29020887)
Supplement: Supplementary file 1 [file 29020887]

## **Supporting Information**

### **Characterization of PI/PVDF-TrFE composite nanofiber-based triboelectric nanogenerators depending on types of the electrospinning system**

**Yeongjun Kim, Xinwei Wu, Chaeun Lee, and Je Hoon Oh\***

Department of Mechanical Engineering and BK21 FOUR ERICA-ACE Center, Hanyang University,  
Ansan, Gyeonggi-do 15588, Republic of Korea

\* Corresponding author (E-mail: [jehoon@hanyang.ac.kr](mailto:jehoon@hanyang.ac.kr))

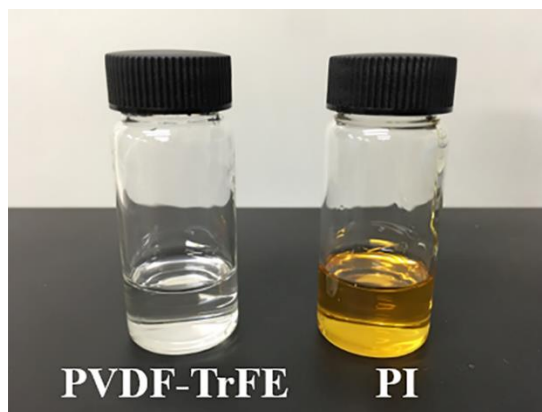

**Figure S1.** PVDF-TrFE and PI solutions.

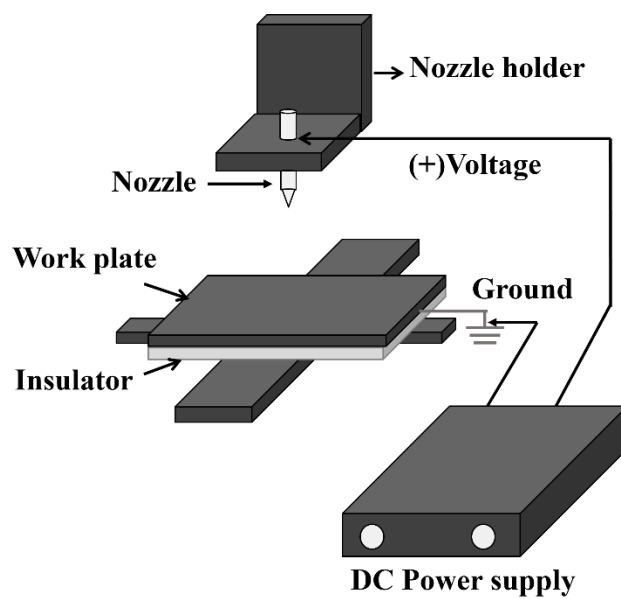

**Figure S2.** Schematic of an electrospinning system with a plate collector. Note that nozzle could be a single or a conjugated.

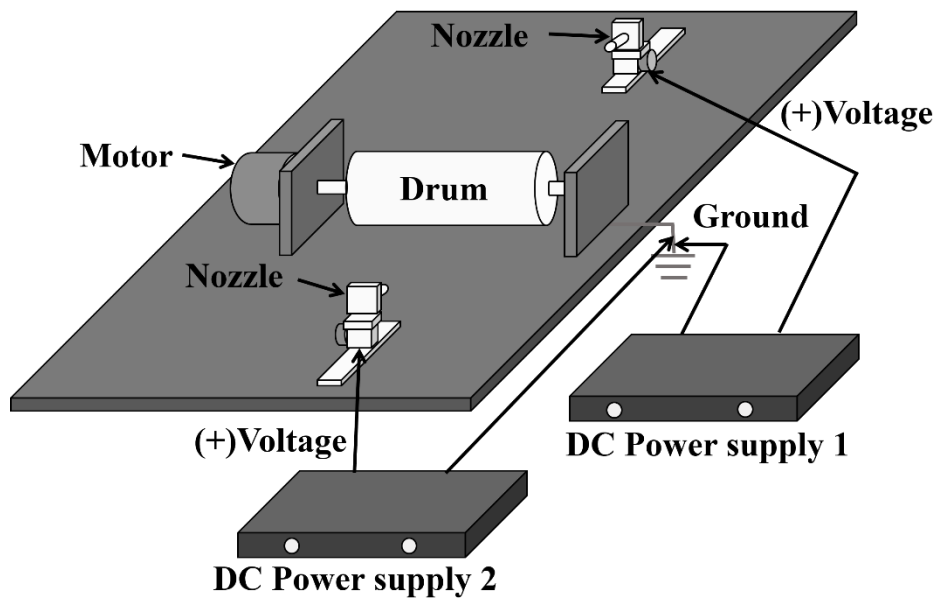

**Figure S3.** Schematic of an electrospinning system with a drum collector. Note that nozzle configuration could be a single-nozzle, a conjugated-nozzle, or a multi-nozzle.

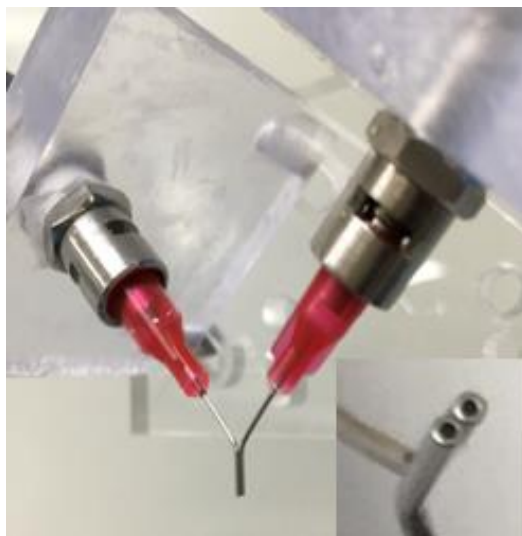

**Figure S4.** Image of conjugated-nozzle configuration. The inset image is enlarged view of nozzle tip.

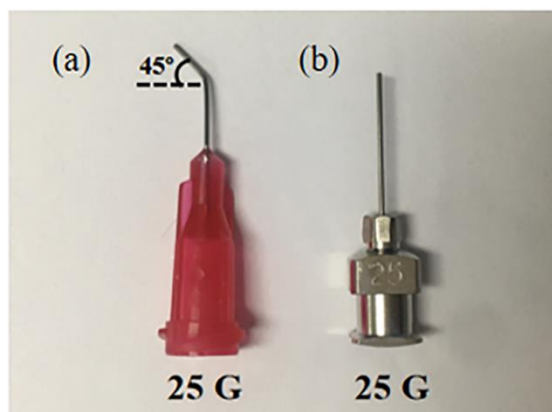

**Figure S5.** Picture of the nozzles used in (a) the conjugated-nozzle system, and (b) the single-nozzle and multi-nozzle systems.

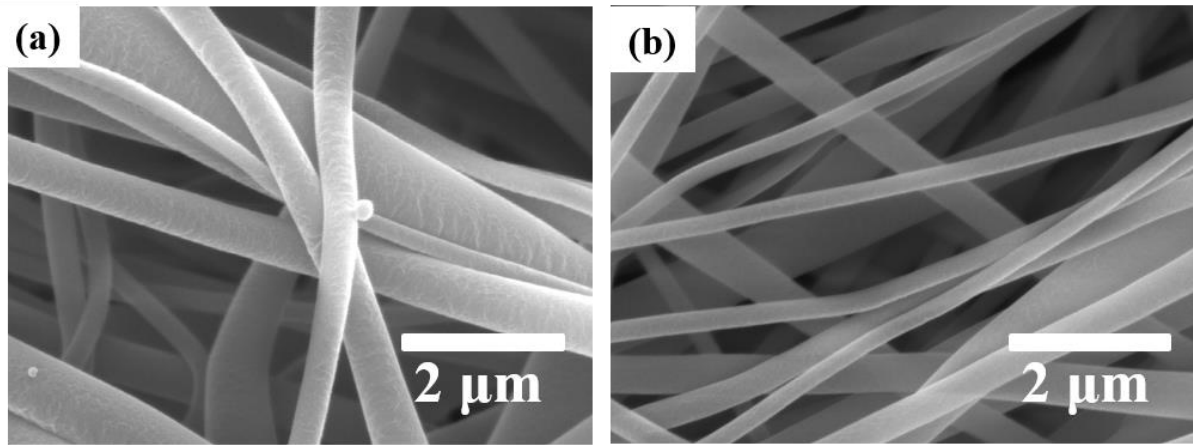

**Figure S6.** SEM images of (a) PI nanofibers in S1 nanofiber and (b) PVDF-TrFE nanofiber in S2 nanofiber.

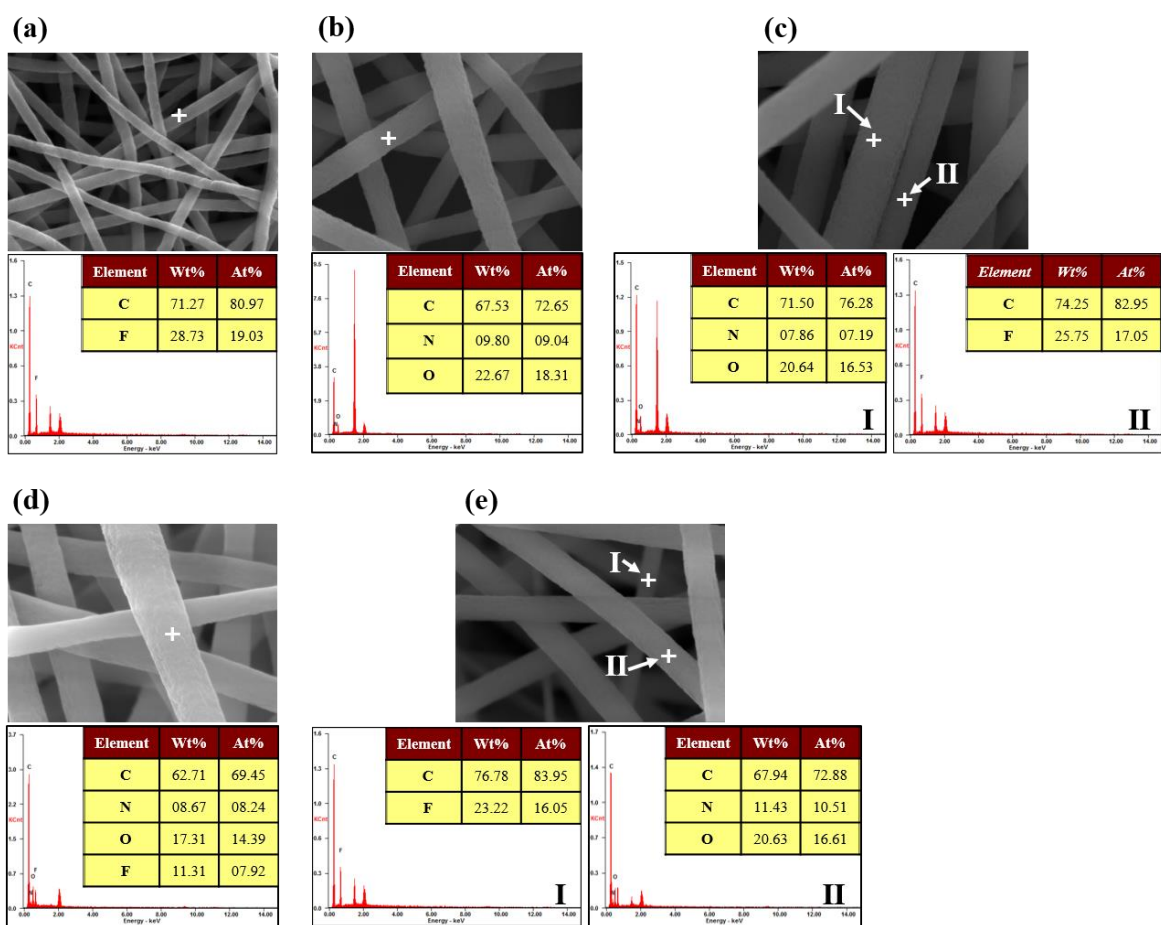

**Figure S7.** SEM and EDS images of (a) S1 nanofiber, (b) S2 nanofiber, (c and d) C nanofiber, and (e) M nanofiber.



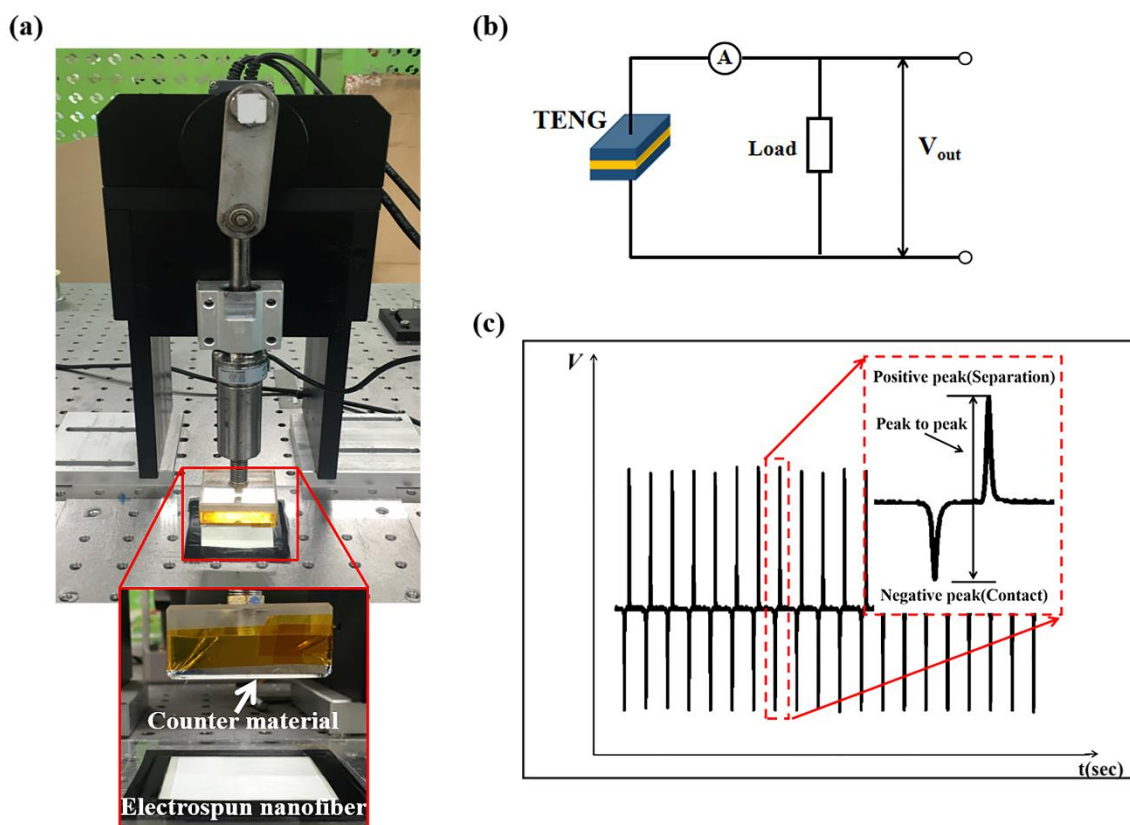

**Figure S8.** (a) In-house actuating system. (b) Electric circuit for TENG characterization. (c) Output voltage corresponding to the contact and separation between P(VDF-TrFE) nanofibers and a counter material.

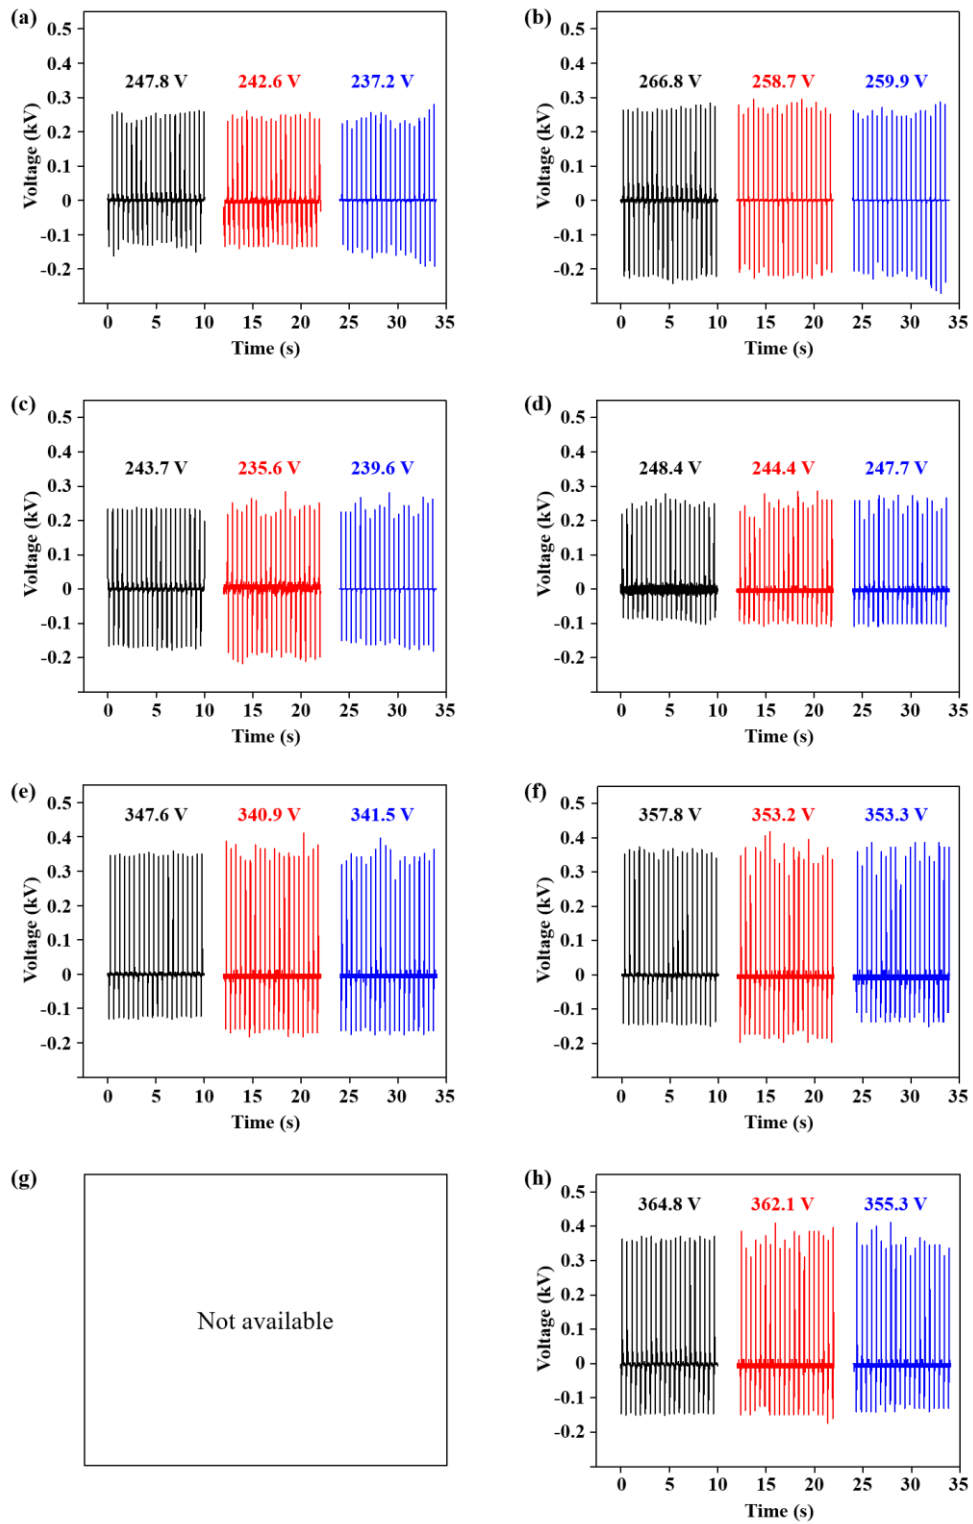

**Figure S9.** The output voltages of (a) S1\_P, (b) S1\_D, (c) S2\_P, (d) S2\_D, (e) C\_P, (f) C\_D, (g) M\_P, and (h) M\_D. Note that M\_P was not available (see Section 2.2).

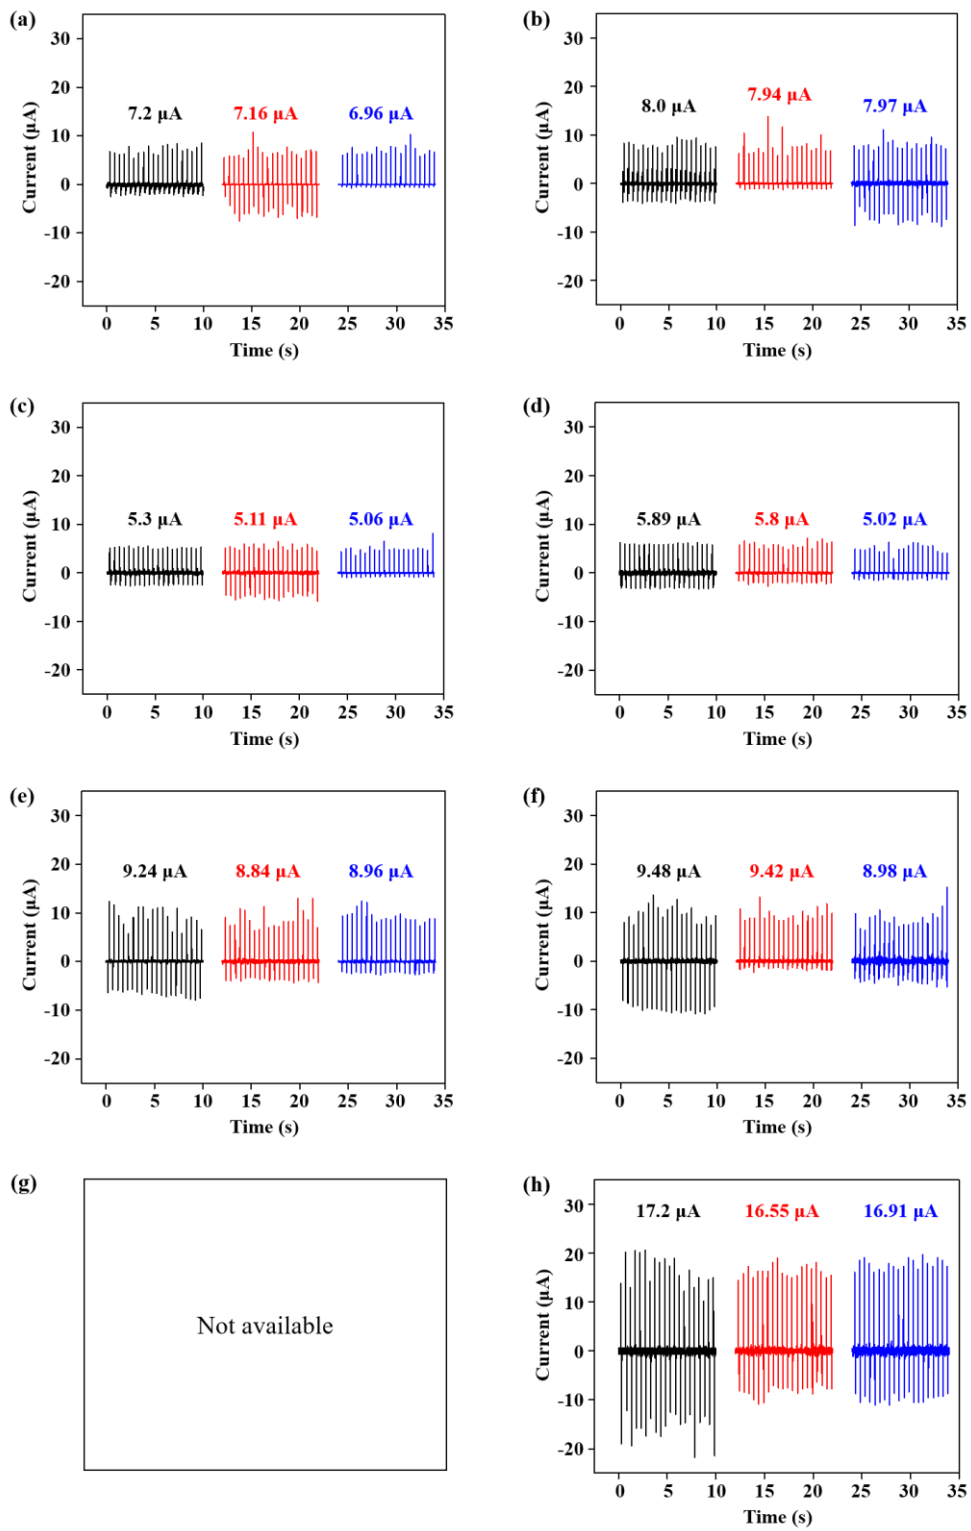

**Figure S10.** The short circuit currents of (a) S1\_P, (b) S1\_D, (c) S2\_P, (d) S2\_D, (e) C\_P, (f) C\_D, (g) M\_P, and (h) M\_D. Note that M\_P was not available (see Section 2.2).
